# Supplementary material for: Novel Orthopoxvirus Infection in an Alaska Resident
Source: PubMed Central journal article supplement — Clin Infect Dis. 2017 Mar 15;64(12):1737–41. doi: 10.1093/cid/cix219 (PMC5447873; doi:10.1093/cid/cix219), 2017-03-15
Supplement: cix219_suppl_Supplementary_table_1.pdf [file cix219_suppl_Supplementary_table_1.pdf]

**Supplementary Table 1.** Code; genus; species, or isolate name; strain; and GenBank accession number for each isolate included in the phylogenetic analyses and included in Supplementary Figure 1.

| Code                    | Genus                     | Species or isolate name                          | Strain                 | GenBank accession number |
|-------------------------|---------------------------|--------------------------------------------------|------------------------|--------------------------|
| <i>Entomopoxvirinae</i> |                           |                                                  |                        |                          |
| AMEV                    | <i>Betaentomopoxvirus</i> | <i>Amsacta moorei entomopoxvirus</i>             | Moyer                  | NC_002520                |
| MSEV                    | Undefined                 | <i>Melanoplus sanguinipes entomopoxvirus 'O'</i> | Tucson                 | NC_001993                |
| <i>Chordopoxvirinae</i> |                           |                                                  |                        |                          |
| CNPV                    | <i>Avipoxvirus</i>        | <i>Canarypox virus</i>                           | ATCC VR111             | NC_005309                |
| FWPV                    | <i>Avipoxvirus</i>        | <i>Fowlpox virus</i>                             | HP1 438 Munich         | AJ581527                 |
| FWPV                    | <i>Avipoxvirus</i>        | <i>Fowlpox virus</i>                             | FCV Iowa               | NC_002188                |
| GTPV                    | <i>Capripoxvirus</i>      | <i>Goatpox virus</i>                             | G20 LKV                | AY077836                 |
| GTPV                    | <i>Capripoxvirus</i>      | <i>Goatpox virus</i>                             | Pellor                 | NC_004003                |
| LSDV                    | <i>Capripoxvirus</i>      | <i>Lumpy skin disease virus</i>                  | Neethling 2490         | NC_003027                |
| LSDV                    | <i>Capripoxvirus</i>      | <i>Lumpy skin disease virus</i>                  | LW 1959                | AF409138                 |
| LSDV                    | <i>Capripoxvirus</i>      | <i>Lumpy skin disease virus</i>                  | Neethling Warmbaths LW | AF409137                 |
| SPPV                    | <i>Capripoxvirus</i>      | <i>Sheeppox virus</i>                            | Strain A               | AY077833                 |
| SPPV                    | <i>Capripoxvirus</i>      | <i>Sheeppox virus</i>                            | NISKHI                 | AY077834                 |
| SPPV                    | <i>Capripoxvirus</i>      | <i>Sheeppox virus</i>                            | TU V02127              | NC_004002                |
| DPV                     | <i>Cervidpoxvirus</i>     | <i>Mule deerpox virus</i>                        | W84                    | AY689437                 |
| DPV                     | <i>Cervidpoxvirus</i>     | <i>Mule deerpox virus</i>                        | W83                    | NC_006966                |
| CRV                     | <i>Crocodylidpoxvirus</i> | <i>Nile crocodilepox virus</i>                   | Zimbabwe               | NC_008030                |
| MYXV                    | <i>Leporipoxvirus</i>     | <i>Myxoma virus</i>                              | Lausanne               | NC_001132                |
| MYXV                    | <i>Leporipoxvirus</i>     | <i>Myxoma virus</i>                              | 6918                   | EU552530                 |
| RFV                     | <i>Leporipoxvirus</i>     | <i>Rabbit fibroma virus</i>                      | Kasza                  | NC_001266                |
| MOCV                    | <i>Molluscipoxvirus</i>   | <i>Molluscum contagiosum virus</i>               | St1 (Subtype 1)        | NC_001731                |
| AKMV                    | <i>Orthopoxvirus</i>      | Akhmeta virus <sup>a</sup>                       | GCP2013                | KM046934-42              |
| CMLV                    | <i>Orthopoxvirus</i>      | <i>Camelpox virus</i>                            | CMS                    | AY009089                 |
| CMLV                    | <i>Orthopoxvirus</i>      | <i>Camelpox virus</i>                            | M96                    | NC_003391                |
| CPXV                    | <i>Orthopoxvirus</i>      | <i>Cowpox virus</i>                              | Brighton Red           | NC_003663                |
| CPXV                    | <i>Orthopoxvirus</i>      | <i>Cowpox virus</i>                              | GRI 90                 | X94355                   |
| CPXV                    | <i>Orthopoxvirus</i>      | <i>Cowpox virus</i>                              | Germany 91 3           | DQ437593                 |
| ECTV                    | <i>Orthopoxvirus</i>      | <i>Ectromelia virus</i>                          | Moscow                 | NC_004105                |
| ECTV                    | <i>Orthopoxvirus</i>      | <i>Ectromelia virus</i>                          | Naval                  | KJ563295                 |
| MPXV                    | <i>Orthopoxvirus</i>      | <i>Monkeypox virus</i>                           | Zaire 1979             | DQ011155                 |
| MPXV                    | <i>Orthopoxvirus</i>      | <i>Monkeypox virus</i>                           | Sierra Leone           | AY741551                 |
| MPXV                    | <i>Orthopoxvirus</i>      | <i>Monkeypox virus</i>                           | Liberia 1970           | DQ011156                 |
| MPXV                    | <i>Orthopoxvirus</i>      | <i>Monkeypox virus</i>                           | Congo 2003             | DQ011154                 |
| RACV                    | <i>Orthopoxvirus</i>      | <i>Raccoonpox virus</i>                          | MD 1964                | FJ807746-54              |

|      |                      |                                             |                                |             |
|------|----------------------|---------------------------------------------|--------------------------------|-------------|
| SKPV | <i>Orthopoxvirus</i> | <i>Skunkpox virus</i>                       | USA 1978                       | FJ807755-63 |
| TATV | <i>Orthopoxvirus</i> | <i>Taterapox virus</i>                      | Dahomey 1968                   | NC_008291   |
| TDV  | <i>Orthopoxvirus</i> | AK2015_poxvirus <sup>a</sup>                | AK2015                         | KX914668-76 |
| VACV | <i>Orthopoxvirus</i> | <i>Vaccinia virus</i>                       | Lister                         | AY678276    |
| VACV | <i>Orthopoxvirus</i> | <i>Vaccinia virus</i>                       | Duke                           | DQ439815    |
| VACV | <i>Orthopoxvirus</i> | <i>Vaccinia virus</i>                       | Copenhagen                     | M35027      |
| VACV | <i>Orthopoxvirus</i> | <i>Vaccinia virus</i>                       | MVA (Modified vaccinia Ankara) | U94848      |
| HSPV | <i>Orthopoxvirus</i> | (Horsepox virus) <sup>b</sup>               | MNR76                          | DQ792504    |
| RPXV | <i>Orthopoxvirus</i> | (Rabbitpox virus) <sup>b</sup>              | Utrecht                        | AY484669    |
| VARV | <i>Orthopoxvirus</i> | <i>Variola virus</i>                        | Bangladesh 1975                | L22579      |
| VARV | <i>Orthopoxvirus</i> | <i>Variola virus</i>                        | India 1967                     | NC_001611   |
| VARV | <i>Orthopoxvirus</i> | <i>Variola virus</i>                        | Garcia 1966                    | Y16780      |
| VPXV | <i>Orthopoxvirus</i> | <i>Volepox virus</i>                        | USA 1985                       | FJ807737-45 |
| BPSV | <i>Parapoxvirus</i>  | <i>Bovine papular stomatitis virus</i>      | BV AR02                        | NC_005337   |
| ORFV | <i>Parapoxvirus</i>  | <i>Orf virus</i>                            | NZ2                            | DQ184476    |
| ORFV | <i>Parapoxvirus</i>  | <i>Orf virus</i>                            | IA82                           | AY386263    |
| ORFV | <i>Parapoxvirus</i>  | <i>Orf virus</i>                            | SA00                           | NC_005336   |
| SWPV | <i>Suipoxvirus</i>   | <i>Swinepox virus</i>                       | Neb 17077 99                   | NC_003389   |
| TANV | <i>Yatapoxvirus</i>  | <i>Tanapox virus</i>                        | TPV RoC                        | EF420157    |
| TANV | <i>Yatapoxvirus</i>  | <i>Tanapox virus</i>                        | Kenya                          | NC_009888   |
| YLDV | <i>Yatapoxvirus</i>  | <i>Yaba-like disease virus</i> <sup>c</sup> | Davis                          | NC_002642   |
| YMTV | <i>Yatapoxvirus</i>  | <i>Yaba monkey tumor virus</i>              | Amano                          | NC_005179   |

<sup>a</sup> Isolate names, as these species are not yet recognized by the International Committee on Taxonomy of Viruses (ICTV)

<sup>b</sup> Also a strain of *Vaccinia virus*, though commonly referred to by the listed name

<sup>c</sup> A strain of *Tanapox virus*, though commonly referred to by the listed name
