# Supplementary material for: Novel Orthopoxvirus Infection in an Alaska Resident
Source: PubMed Central journal article supplement — Clin Infect Dis. 2017 Mar 15;64(12):1737–41. doi: 10.1093/cid/cix219 (PMC5447873; doi:10.1093/cid/cix219), 2017-03-15
Supplement: cix219_suppl_Supplementary_table_2.pdf [file cix219_suppl_Supplementary_table_2.pdf]

**Supplementary Table 2.** Laboratory results for environmental samples. All samples were tested by using an *Orthopoxvirus* generic real-time polymerase chain reaction assay. Results were run in triplicate for 40 cycles.

| Sample                                                                                       | Sample type | Test result |
|----------------------------------------------------------------------------------------------|-------------|-------------|
| Wooden jewelry box (brought back from Azerbaijan)                                            | Swab        | Negative    |
| Wooden jewelry box (brought back from Azerbaijan)                                            | Swab        | Negative    |
| Cloth jewelry pouch (brought back from Azerbaijan)                                           | Swab        | Negative    |
| Metal pendant, unknown point of origin, stored in cloth jewelry pouch                        | Swab        | Negative    |
| Collar of work jacket (brought back from Azerbaijan)                                         | Swab        | Negative    |
| Liner and internal pocket of work jacket (brought back from Azerbaijan)                      | Swab        | Negative    |
| Butt of pellet rifle used by patient's children to shoot squirrels around the patient's home | Swab        | Negative    |
| Top of indoor fridge in patient's home (possible small mammal contact)                       | Swab        | Negative    |
| Indoor pantry shelf in patient's home (possible small mammal contact)                        | Swab        | Negative    |
| Basket on top of indoor fridge in patient's home (possible small mammal contact)             | Swab        | Negative    |
| Top of outdoor freezer on porch of patient's home (possible small mammal contact)            | Swab        | Negative    |
| Small mammal feces, top of outdoor freezer on porch of patient's home                        | Feces       | Negative    |
| Top of outdoor grill on porch of patient's home (possible small mammal contact)              | Swab        | Negative    |
| Small mammal feces, plywood floor next to outdoor freezer on porch of patient's home         | Feces       | Negative    |

|                                                                                                                                |       |          |
|--------------------------------------------------------------------------------------------------------------------------------|-------|----------|
| Small mammal feces, wooden pallet underneath outdoor freezer on porch of patient's home                                        | Feces | Negative |
| Small mammal feces, corner of patient's home                                                                                   | Feces | Negative |
| Mossy patch of ground at corner of patient's home (possible small mammal contact)                                              | Swab  | Negative |
| Small mammal feces, top of outdoor stove on the side of the patient's home                                                     | Feces | Negative |
| Top of outdoor stove on the west side of the patient's home (possible small mammal contact)                                    | Swab  | Negative |
| Scrap wood taken from shed occupied by small mammals and used in construction at new home site (possible small mammal contact) | Swab  | Negative |
| Scrap wood taken from shed occupied by small mammals and used in construction at new home site (possible small mammal contact) | Swab  | Negative |
| Scrap wood taken from shed occupied by small mammals and used in construction at new home site (possible small mammal contact) | Swab  | Negative |
| Small mammal feces, scrap wood pile at new home site                                                                           | Feces | Negative |
